# Supplementary material for: Synergistic integration of FeNi magnetic nanoparticles with graphene-based porous carbon for efficient capture of N-linked glycans
Source: Royal Society of Chemistry journal article supplement (doi:10.1039/d0nr05401a), 2020-01-01

Supplementary Information for

## **Synergistic integration of FeNi magnetic nanoparticles with graphene-based porous carbon for efficient capture of N-linked glycans**

Yang Wang,<sup>1, a</sup> Jiayi Wang,<sup>1, a</sup> Jie Li,<sup>1</sup> Yun Ling,<sup>1,2,\*</sup> Yu Jia,<sup>1</sup> Yongtai Yang,<sup>1</sup> Xiaofeng Liu,<sup>1</sup> Xiangmin Zhang,<sup>1</sup> Yaming Zhou<sup>1,\*</sup>

<sup>1</sup> Shanghai Key Laboratory of Molecular Catalysis and Innovative Materials, Department of Chemistry, Fudan University, Shanghai, 200438, China.

<sup>2</sup> Zhuhai-Fudan Innovation Institute, Zhuhai, Guangdong, 519000, China.

### **AUTHOR INFORMATION**

<sup>a</sup> These two authors contribution equally to this work

\* Corresponding authors:

Prof. Dr. Yun Ling, E-mail address: [yunling@fudan.edu.cn](mailto:yunling@fudan.edu.cn)

Prof. Dr. Yaming Zhou, E-mail address: [ymzhou@fudan.edu.cn](mailto:ymzhou@fudan.edu.cn)

**Scheme S1.** A schematic illustration of the procedure for N-linked glycans enrichment.

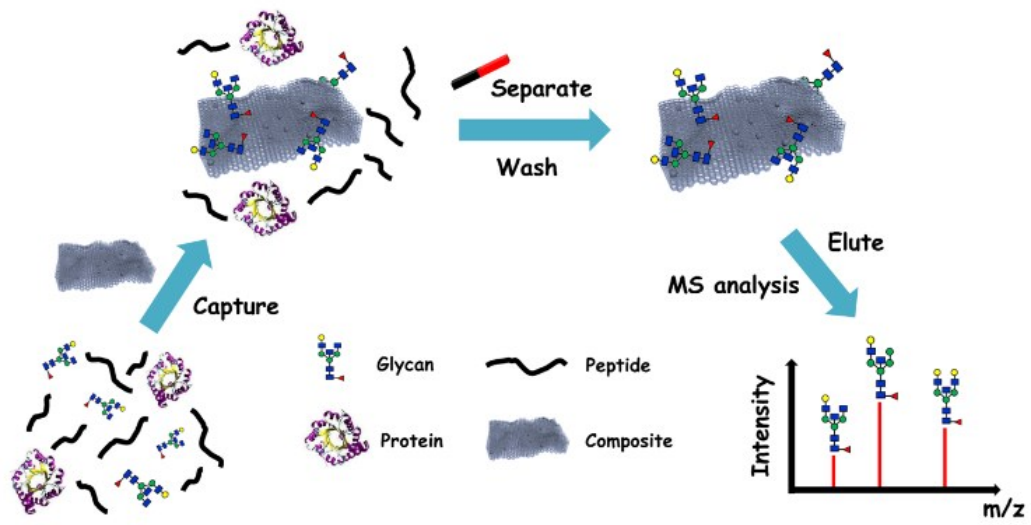

**Fig. S1.** (a) PXRD patterns of MagOG, MagOG@PF, MagOG@PF@Ni-MOF and Ni-MOF. The red star symbol labels diffraction peak of graphene nanoplatelets, and green triangle labels the diffraction peaks of  $\text{Fe}_3\text{O}_4$  nanoparticles; (b) FT-IR spectra of MagOG, MagOG@PF, and MagOG@PF@Ni-MOF. The FT-IR spectrum provides additional evidence of the formation of PF layer because of the presence of new absorption bands in the range of  $1560\text{-}950\text{ cm}^{-1}$  attributing to the stretching and plane bending vibration of the aromatic rings. Moreover, the sharp increase in intensity of the peaks at  $3430\text{ cm}^{-1}$  is resulted from the O-H stretching vibration of PF resin. The FT-IR spectrum of MagOG@PF@Ni-MOF also reveals difference. Besides the intensity of the peaks at  $3430\text{ cm}^{-1}$  and  $1560\text{-}950\text{ cm}^{-1}$  increasing, a new peak appears at  $778\text{ cm}^{-1}$  belonging to the substituted aromatic compounds, indicating that the existence of the organic ligand 1H-pyrazole-4-carboxylic acid.

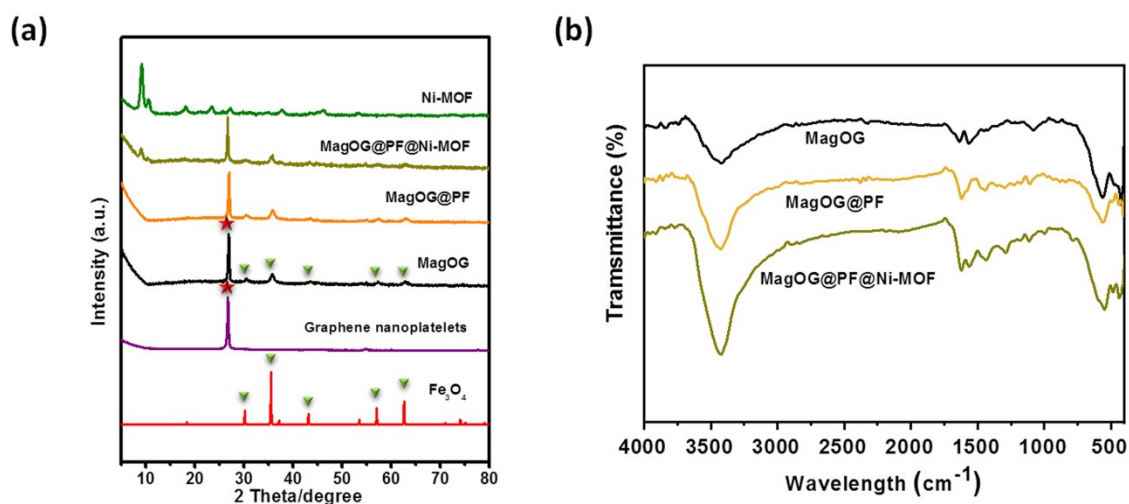

**Fig. S2.** PXRD patterns of FeNi-G/PC-600, 700, 800, and 900, in which the red star labels the diffraction peak of graphene nanoplatelets, the green triangle labels the diffraction peaks of Fe<sub>3</sub>O<sub>4</sub>, the red ball represents the formation of FeNi at T = 600 °C.

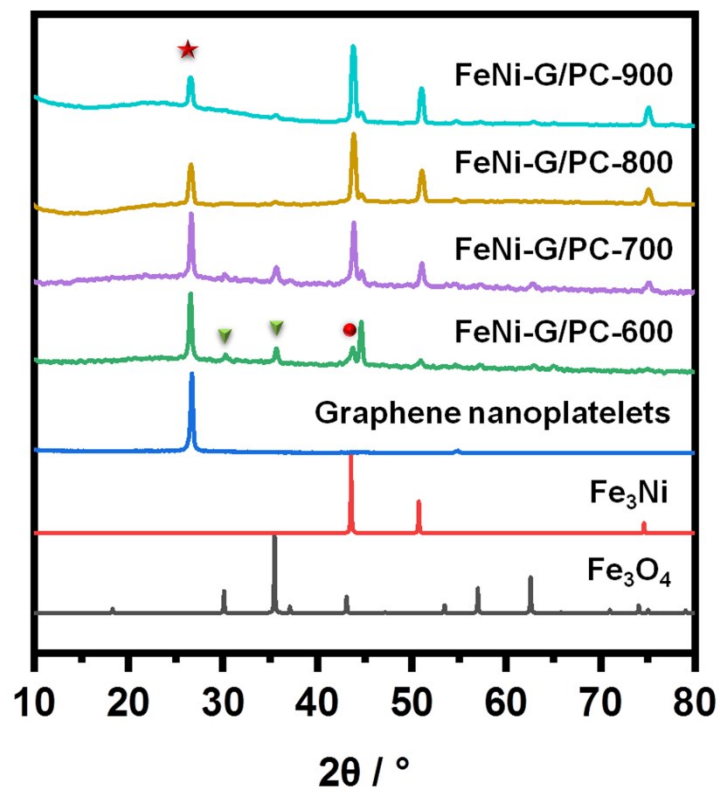

**Fig. S3.** PXRD pattern of MagOG@PF (a) and Ni-MOF (b) carbonized at  $T = 800\text{ }^{\circ}\text{C}$ , showing the generation Fe phase labels as blue triangle (the green triangle labels the diffraction peaks of  $\text{Fe}_3\text{O}_4$ ) and the Ni phase labels as green cubic.

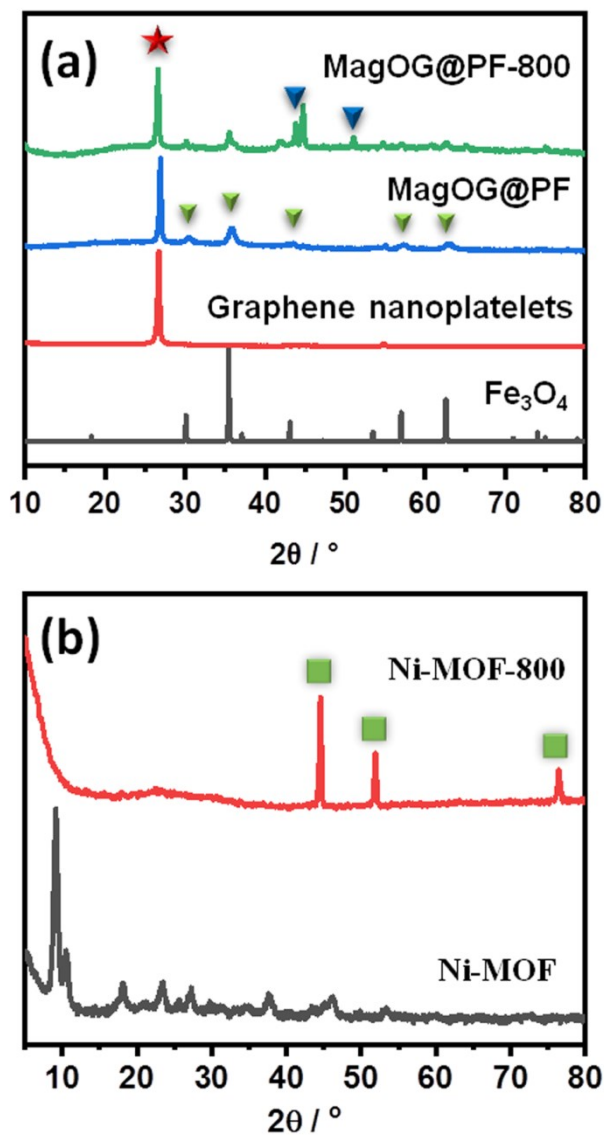

**Fig. S4.** N<sub>2</sub> adsorption-desorption isotherms of MagOG@PF@Ni-MOF at 77 K. Pore size distributions calculated by H-K for the analysis of micropore and BJH for the mesopore.

The result demonstrate that the Brunauer-Emmett-Teller (BET) surface area of MagOG@PF@Ni-MOF is 62 m<sup>2</sup>/g. Analysis of pore size distribution based on adsorption isotherm by H-K method indicates a mean diameter of ~18 Å (Fig S4b). Analysis of pore size distribution based on desorption isotherm by BJH method reveals a mean diameter of ~4 nm (Fig S4c).

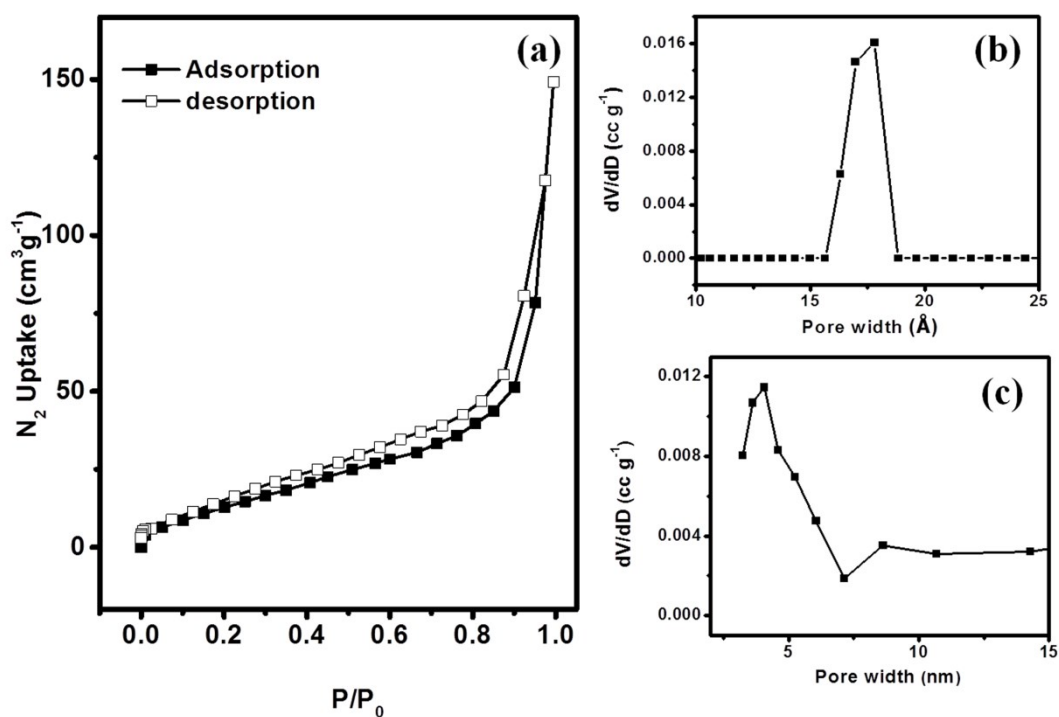

**Fig. S5.** Magnetization curve of composites at 300K. Field-dependent magnetic study is carried out to access the magnetic property of MagOG, MagOG@PF@Ni-MOF and FeNi-G/PC-800 at 300 K, respectively (Fig S5). M-H plot shows that the saturation magnetization ( $M_s$ ) of MagOG, MagOG@PF@Ni-MOF and FeNi-G/PC-800 are 35.1 emu/g, 24.5 emu/g and 32.6 emu/g respectively.

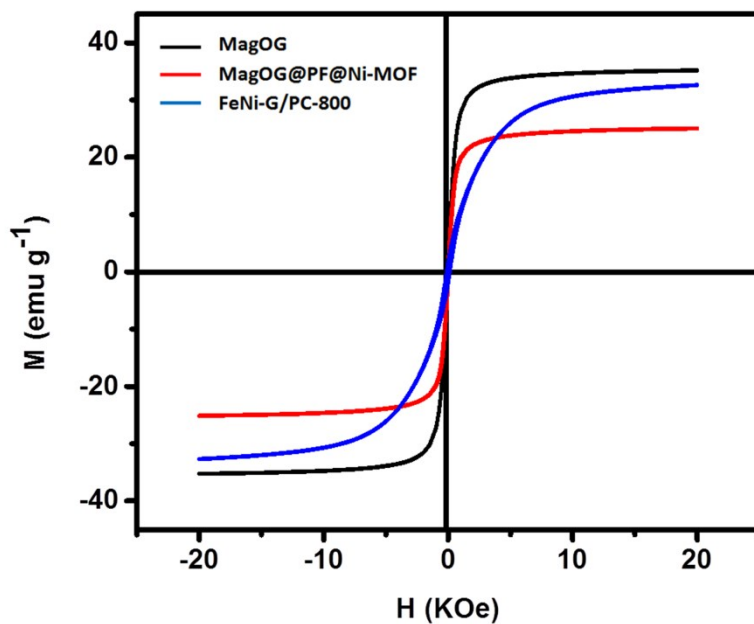

**Fig. S6.** N<sub>2</sub> adsorption-desorption isotherms of FeNi-G/PC-T (T=700, 800, 900) at 77 K. Pore size distributions calculated by H-K for the analysis of micropore and BJH for the mesopore, respectively.

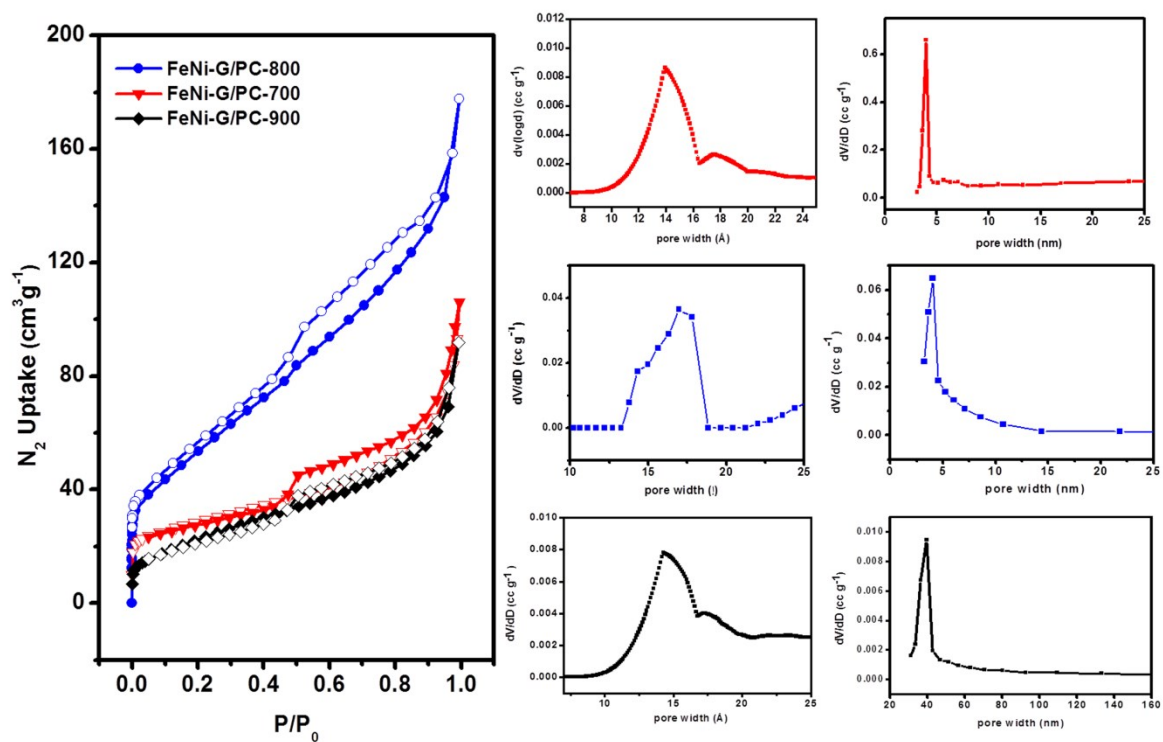



**Fig. S7.** Raman spectrum of FeNi-G/PC-T (T = 600, 700, 800, 900 °C).

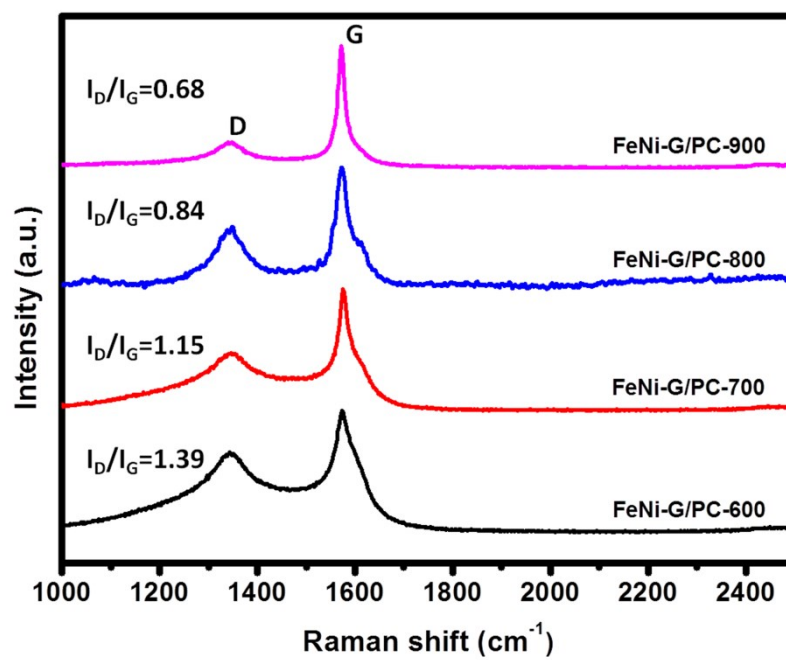

**Fig. S8.** MALDI-TOF-MS analysis of glycans derived from OVA enriched by FeNi-G/PC-800 with different eluent (a) 10% ACN; (b) 30% ACN; (c) 50% ACN and (d) 80% ACN. The peaks marked with red asterisks represent the identified N-linked glycans.

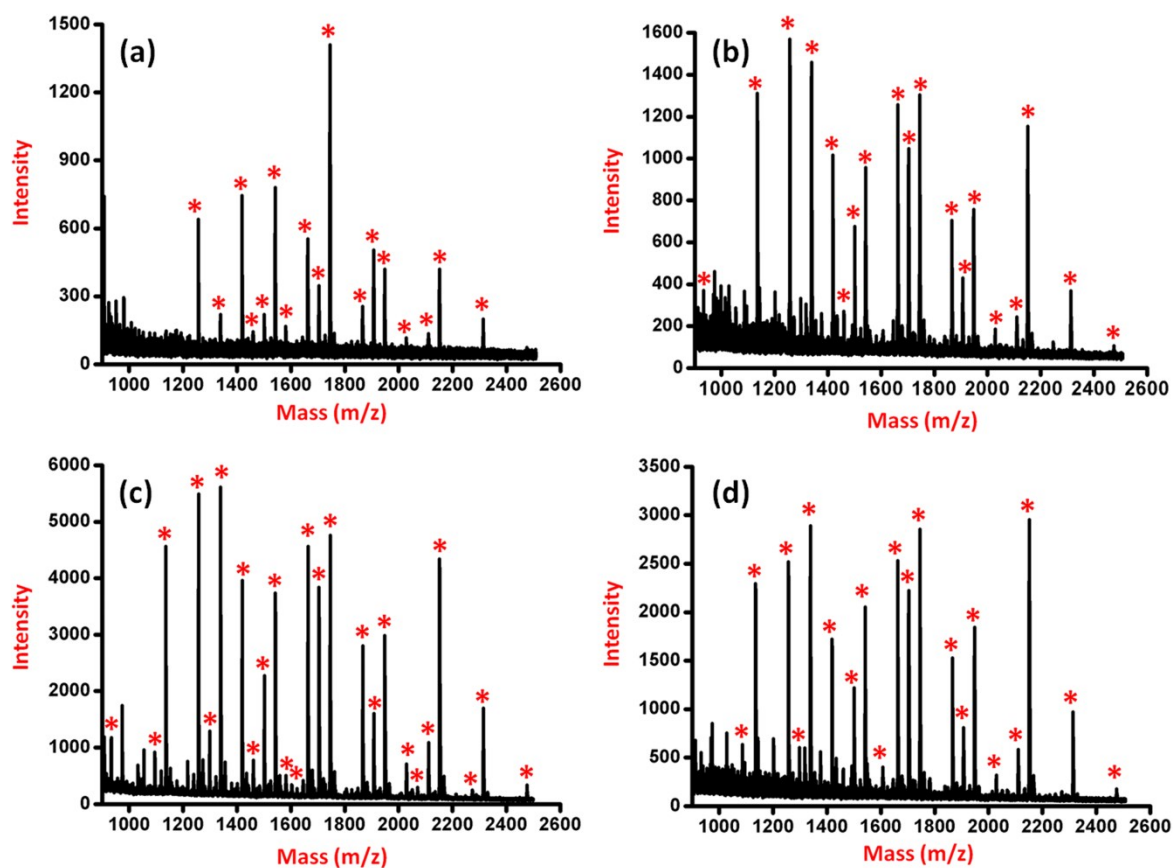

**Fig. S9.** MALDI-TOF-MS analysis of the N-linked glycans derived from the mixture of OVA digests, glycosylated proteins (OVA), and nonglycosylated proteins (BSA) (at mass ratio of 1:800:800). Supernate before enrichment (a) in positive mode and (b) in linear mode and eluate after enrichment by FeNi-G/PC-800 (c) in positive mode and (d) in linear mode. The peaks marked with red asterisks represent the identified N-linked glycans.

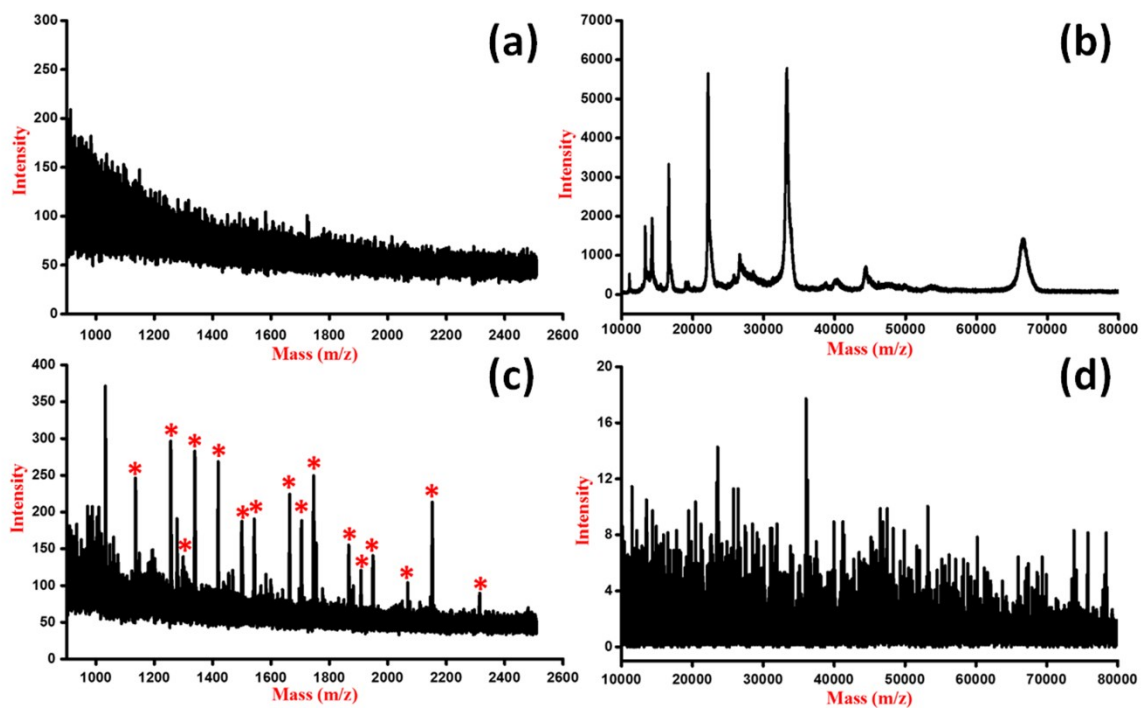

**Fig. S10.** MALDI-TOF-MS analysis of N-linked glycans identified from normal human serum before enrichment with FeNi-G/PC-800.

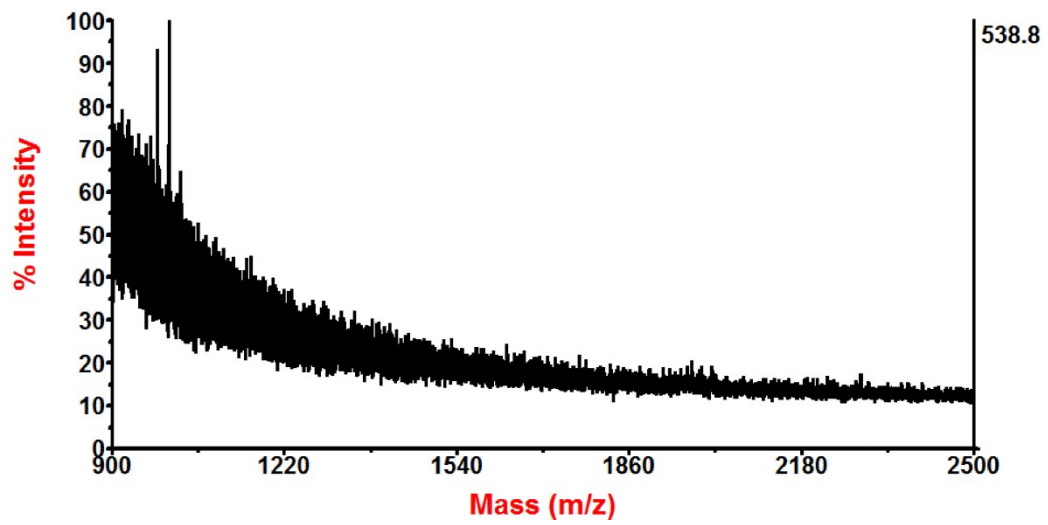

## Detailed information of N-linked glycans.

**Table S1** List of identified 25 N-linked glycans released from OVA digests enriched by FeNi-G/PC-800.

| No. | M/Z<br>[M+ Na] <sup>+</sup> | S/N    | Composition                          |
|-----|-----------------------------|--------|--------------------------------------|
| 1   | 933.4                       | 126.88 | Hex <sub>3</sub> HexNAC <sub>2</sub> |
| 2   | 1095.4                      | 91.01  | Hex <sub>4</sub> HexNAC <sub>2</sub> |
| 3   | 1136.5                      | 553.22 | Hex <sub>3</sub> HexNAC <sub>3</sub> |
| 4   | 1257.5                      | 670.13 | Hex <sub>5</sub> HexNAC <sub>2</sub> |
| 5   | 1298.6                      | 151.13 | Hex <sub>4</sub> HexNAC <sub>3</sub> |
| 6   | 1339.6                      | 775.46 | Hex <sub>3</sub> HexNAC <sub>4</sub> |
| 7   | 1419.6                      | 507.42 | Hex <sub>6</sub> HexNAC <sub>2</sub> |
| 8   | 1460.7                      | 89.87  | Hex <sub>5</sub> HexNAC <sub>3</sub> |
| 9   | 1501.7                      | 309.93 | Hex <sub>4</sub> HexNAC <sub>4</sub> |
| 10  | 1542.7                      | 522.08 | Hex <sub>3</sub> HexNAC <sub>5</sub> |
| 11  | 1581.7                      | 51.14  | Hex <sub>7</sub> HexNAC <sub>2</sub> |
| 12  | 1622.7                      | 21.61  | Hex <sub>6</sub> HexNAC <sub>3</sub> |
| 13  | 1663.8                      | 557.08 | Hex <sub>5</sub> HexNAC <sub>4</sub> |
| 14  | 1704.8                      | 521.13 | Hex <sub>4</sub> HexNAC <sub>5</sub> |
| 15  | 1745.8                      | 676.91 | Hex <sub>3</sub> HexNAC <sub>6</sub> |
| 16  | 1866.9                      | 387.13 | Hex <sub>5</sub> HexNAC <sub>5</sub> |
| 17  | 1907.0                      | 227.13 | Hex <sub>4</sub> HexNAC <sub>6</sub> |
| 18  | 1948.0                      | 436.89 | Hex <sub>3</sub> HexNAC <sub>7</sub> |
| 19  | 2028.0                      | 84.22  | Hex <sub>6</sub> HexNAC <sub>5</sub> |
| 20  | 2069.1                      | 20.38  | Hex <sub>5</sub> HexNAC <sub>6</sub> |
| 21  | 2110.1                      | 158.60 | Hex <sub>4</sub> HexNAC <sub>7</sub> |
| 22  | 2151.1                      | 728.90 | Hex <sub>8</sub> HexNAC <sub>4</sub> |
| 23  | 2272.2                      | 25.52  | Hex <sub>4</sub> HexNAC <sub>7</sub> |
| 24  | 2313.2                      | 301.87 | Hex <sub>3</sub> HexNAC <sub>8</sub> |
| 25  | 2475.3                      | 46.40  | Hex <sub>5</sub> HexNAC <sub>8</sub> |

**Table S2.** Detailed information of the observed N-linked glycans from normal human serum by enriching with FeNi-G/PC-800 composites (N-linked glycans were released by PNGase F digestion, and glycan structures were searched from Glycoworkbench through the Mol. wt of oligosaccharide. Part of the structures has been demonstrated.

| No | M/Z<br>([M+nNa] <sup>+</sup> ) | Composition | Structure (M) |
|----|--------------------------------|-------------|---------------|
| 1  | 933.1                          | H3N2        |               |
| 2  | 1136.4                         | H3N3        |               |
| 3  | 1257.4                         | H5N2        |               |
| 4  | 1281.5                         | H3N3F1      |               |
| 5  | 1298.5                         | H4N3        |               |
| 6  | 1338.5                         | H3N4        |               |
| 7  | 1388.9                         | H5N2X1      |               |
| 8  | 1419.5                         | H6N2        |               |
| 9  | 1443.5                         | H4N3F1      |               |
| 10 | 1460.5                         | H5N3        |               |
| 11 | 1485.6                         | H3N4F1      |               |
| 12 | 1501.6                         | H4N4        |               |

|    |        |        |                                                                                      |
|----|--------|--------|--------------------------------------------------------------------------------------|
| 13 | 1541.6 | H3N5   | 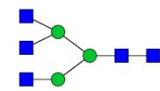   |
| 14 | 1581.6 | H7N2   |    |
| 15 | 1606.2 | H5N3F1 |    |
| 16 | 1621.6 | H6N3   |    |
| 17 | 1629.6 | H3N4A1 |    |
| 18 | 1646.7 | H4N4F1 |    |
| 19 | 1662.7 | H5N4   |    |
| 20 | 1688.7 | H3N5F1 |   |
| 21 | 1704.7 | H4N5   |  |
| 22 | 1743.6 | H8N2   |  |
| 23 | 1767.6 | H6N3F1 |  |
| 24 | 1791.7 | H3N5A1 |  |
| 25 | 1808.7 | H5N4F1 |  |
| 26 | 1814.2 | H4N4A1 |  |
| 27 | 1824.6 | H6N4   |  |
| 28 | 1850.7 | H4N5F1 |  |

|    |        |           |                                                                                      |
|----|--------|-----------|--------------------------------------------------------------------------------------|
| 29 | 1865.7 | H5N5      | 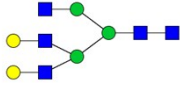   |
| 30 | 1905.2 | H9N2      |    |
| 31 | 1925.7 | H4N45F2X1 |    |
| 32 | 1954.5 | H5N4A1    |    |
| 33 | 2012.8 | H5N5F1    |    |
| 34 | 2028.8 | H6N5      |    |
| 35 | 2156.8 | H5N5A1    |    |
| 36 | 2173.8 | H6N5F1    |   |
| 37 | 2188.6 | H5N3F1A2  |  |
| 38 | 2221.7 | H6N3A2    |  |
| 39 | 2245.7 | H5N4A2    |  |
| 40 | 2267.7 | H5N4F2A1  |  |
| 41 | 2282.7 | H5N5F1A1  |  |
| 42 | 2288.8 | H5N4A2    |  |
| 43 | 2294.7 | H7N4A1    |  |
| 44 | 2302.7 | H4N5A2    |  |



|    |        |          |                                                                                    |
|----|--------|----------|------------------------------------------------------------------------------------|
| 45 | 2305.7 | H5N5F3   | 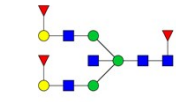 |
| 46 | 2326.8 | H5N5F1A1 |  |
| 47 | 2340.8 | H6N5A1   |  |
| 48 | 2361.8 | H6N5A1   |  |

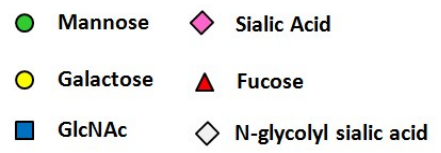

Supplement: d0nr05401a1.pdf [file d0nr05401a1.pdf]
